# Supplementary material
Source: PubMed Central journal article supplement (PMC3769322)
Supplement: supp_M112.023861_mcp.M112.023861-1.pdf [file supp_M112.023861_mcp.M112.023861-1.pdf]

## Legends

Supplemental Table 1. SuperArray analysis of genes expression altered by letrozole resistance. The basal gene expression of AC-1 versus LTLT-Ca cells were examined and select genes that exhibited significant changes in gene expression that are 3-fold or greater are shown.

Supplemental Table 2. Letrozole Resistant Proteomic Analysis. Using a gel free proteomic approach combining tandem mass tag (TMT) labeling, two-dimensional HPLC, and high-resolution mass spectrometry, over 1700 proteins were identified with quantitative abundance ratios present in both the letrozole resistant (LTLT-Ca) and the sensitive (AC-1) breast cancer cells. Of the quantified proteins, a total of 863 were significantly altered ( $p < 0.05$ ), with 411 proteins upregulated and 452 downregulated by at least 20%.

Supplemental Figure 1. Letrozole-Resistance Induced Fascin Expression. (A) AC-1 and (B) LTLT-Ca cells were stained for fascin (green) and DNA (blue) and images were captured using an Olympus Bx41 microscope.

Supplemental Table 1. Expression ratios of select genes from the Breast Cancer and Estrogen Signaling Panel SuperArray analysis that exhibited 3-fold or greater changes in the letrozole resistant cells

| <b>Symbol</b> | <b>Description</b>                                                                            | <b>Fold Change (LTLT-Ca/AC1)</b> |
|---------------|-----------------------------------------------------------------------------------------------|----------------------------------|
| AR            | Androgen receptor                                                                             | -12.6                            |
| BAG1          | BCL2-associated athanogene                                                                    | 5.0                              |
| BCL2          | B-cell CLL/lymphoma 2                                                                         | -346.2                           |
| C3            | Complement component 3                                                                        | 249.6                            |
| CCNA1         | Cyclin A1                                                                                     | -103.9                           |
| CDKN1A        | Cyclin-dependent kinase inhibitor 1A (p21, Cip1)                                              | 11.6                             |
| CLU           | Clusterin                                                                                     | 5.5                              |
| COL6A1        | Collagen, type VI, alpha 1                                                                    | 53.7                             |
| CTSB          | Cathepsin B                                                                                   | 6.9                              |
| CYP19A1       | Cytochrome P450, family 19, subfamily A, polypeptide 1                                        | 4.6                              |
| EGFR          | Epidermal growth factor receptor                                                              | 28.1                             |
| ERBB2         | V-erb-b2 erythroblastic leukemia viral oncogene homolog 2                                     | 5.9                              |
| ESR1          | Estrogen receptor 1                                                                           | -28.1                            |
| FAS           | Fas (TNF receptor superfamily, member 6)                                                      | 6.2                              |
| FOSL1         | FOS-like antigen 1                                                                            | 5.8                              |
| GABRP         | Gamma-aminobutyric acid (GABA) A receptor, pi                                                 | 6202.3                           |
| GSN           | Gelsolin (amyloidosis, Finnish type)                                                          | 3.5                              |
| ID2           | Inhibitor of DNA binding 2, dominant negative helix-loop-helix protein                        | -9.7                             |
| IGFBP2        | Insulin-like growth factor binding protein 2, 36kDa                                           | -3.6                             |
| IL6           | Interleukin 6 (interferon, beta 2)                                                            | 89.2                             |
| IL6ST         | Interleukin 6 signal transducer (gp130, oncostatin M receptor)                                | 5.9                              |
| ITGA6         | Integrin, alpha 6                                                                             | 3.8                              |
| JUN           | Jun oncogene                                                                                  | 4.0                              |
| KLF5          | Kruppel-like factor 5 (intestinal)                                                            | 9.4                              |
| KLK5          | Kallikrein-related peptidase 5                                                                | 9.5                              |
| MUC1          | Mucin 1, cell surface associated                                                              | 19.5                             |
| NFYB          | Nuclear transcription factor Y, beta                                                          | 3.1                              |
| PAPPA         | Pregnancy-associated plasma protein A, pappalysin 1                                           | 6.6                              |
| PGR           | Progesterone receptor                                                                         | -1891.3                          |
| PLAU          | Plasminogen activator, urokinase                                                              | 3.0                              |
| PTGS2         | Prostaglandin-endoperoxide synthase 2                                                         | 34.1                             |
| SERPINA3      | Serpin peptidase inhibitor, clade A (alpha-1 antiproteinase, antitrypsin), member 3           | -6.5                             |
| SERPINB5      | Serpin peptidase inhibitor, clade B (ovalbumin), member 5                                     | 23.6                             |
| SERPINE1      | Serpin peptidase inhibitor, clade E (nexin, plasminogen activator inhibitor type 1), member 1 | 15.1                             |
| SLC7A5        | Solute carrier family 7 (cationic amino acid transporter, y+ system), member 5                | -21.5                            |
| TFF1          | Trefoil factor 1                                                                              | -1146.6                          |
| TNFAIP2       | Tumor necrosis factor, alpha-induced protein 2                                                | 379.7                            |
| TP53          | Tumor protein p53 (Li-Fraumeni syndrome)                                                      | 3.7                              |
| B2M           | Beta-2-microglobulin                                                                          | 11.0                             |

| No | Symbol   | Description                                                                                   | Fold Change (LTLT-Ca/AC1) |
|----|----------|-----------------------------------------------------------------------------------------------|---------------------------|
| 1  | PGR      | Progesterone receptor                                                                         | -1891.3                   |
| 2  | TFF1     | Trefoil factor 1                                                                              | -1146.6                   |
| 3  | BCL2     | B-cell CLL/lymphoma 2                                                                         | -346.2                    |
| 4  | CCNA1    | Cyclin A1                                                                                     | -103.9                    |
| 5  | ESR1     | Estrogen receptor 1                                                                           | -28.1                     |
| 6  | SLC7A5   | Solute carrier family 7 (cationic amino acid transporter, y+ system), member 5                | -21.5                     |
| 7  | AR       | Androgen receptor                                                                             | -12.6                     |
| 8  | ID2      | Inhibitor of DNA binding 2, dominant negative helix-loop-helix protein                        | -9.7                      |
| 9  | SERPINA3 | Serpin peptidase inhibitor, clade A (alpha-1 antitrypsin, antitrypsin), member 3              | -6.5                      |
| 10 | IGFBP2   | Insulin-like growth factor binding protein 2, 36kDa                                           | -3.6                      |
| 11 | PLAU     | Plasminogen activator, urokinase                                                              | 3                         |
| 12 | NFYB     | Nuclear transcription factor Y, beta                                                          | 3.1                       |
| 13 | GSN      | Gelsolin (amyloidosis, Finnish type)                                                          | 3.5                       |
| 14 | TP53     | Tumor protein p53 (Li-Fraumeni syndrome)                                                      | 3.7                       |
| 15 | ITGA6    | Integrin, alpha 6                                                                             | 3.8                       |
| 16 | JUN      | Jun oncogene                                                                                  | 4                         |
| 17 | CYP19A1  | Cytochrome P450, family 19, subfamily A, polypeptide 1                                        | 4.6                       |
| 18 | BAG1     | BCL2-associated athanogene                                                                    | 5                         |
| 19 | CLU      | Clusterin                                                                                     | 5.5                       |
| 20 | FOSL1    | FOS-like antigen 1                                                                            | 5.8                       |
| 21 | ERBB2    | V-erb-b2 erythroblastic leukemia viral oncogene homolog 2                                     | 5.9                       |
| 22 | IL6ST    | Interleukin 6 signal transducer (gp130, oncostatin M receptor)                                | 5.9                       |
| 23 | FAS      | Fas (TNF receptor superfamily, member 6)                                                      | 6.2                       |
| 24 | PAPPA    | Pregnancy-associated plasma protein A, pappalysin 1                                           | 6.6                       |
| 25 | CTSB     | Cathepsin B                                                                                   | 6.9                       |
| 26 | KLF5     | Kruppel-like factor 5 (intestinal)                                                            | 9.4                       |
| 27 | KLK5     | Kallikrein-related peptidase 5                                                                | 9.5                       |
| 28 | B2M      | Beta-2-microglobulin                                                                          | 11                        |
| 29 | CDKN1A   | Cyclin-dependent kinase inhibitor 1A (p21, Cip1)                                              | 11.6                      |
| 30 | SERPINE1 | Serpin peptidase inhibitor, clade E (nexin, plasminogen activator inhibitor type 1), member 1 | 15.1                      |
| 31 | MUC1     | Mucin 1, cell surface associated                                                              | 19.5                      |
| 32 | SERPINB5 | Serpin peptidase inhibitor, clade B (ovalbumin), member 5                                     | 23.6                      |
| 33 | EGFR     | Epidermal growth factor receptor                                                              | 28.1                      |
| 34 | PTGS2    | Prostaglandin-endoperoxide synthase 2                                                         | 34.1                      |
| 35 | COL6A1   | Collagen, type VI, alpha 1                                                                    | 53.7                      |
| 36 | IL6      | Interleukin 6 (interferon, beta 2)                                                            | 89.2                      |
| 37 | C3       | Complement component 3                                                                        | 249.6                     |
| 38 | TNFAIP2  | Tumor necrosis factor, alpha-induced protein 2                                                | 379.7                     |
| 39 | GABRP    | Gamma-aminobutyric acid (GABA) A receptor, pi                                                 | 6202.3                    |

Supplemental Figure 1. Letrozole-Resistance Induced Fascin Expression

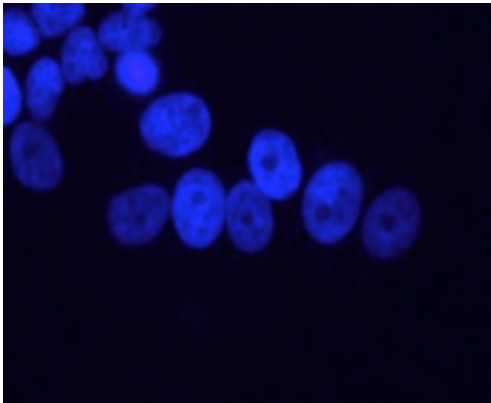

AC-1

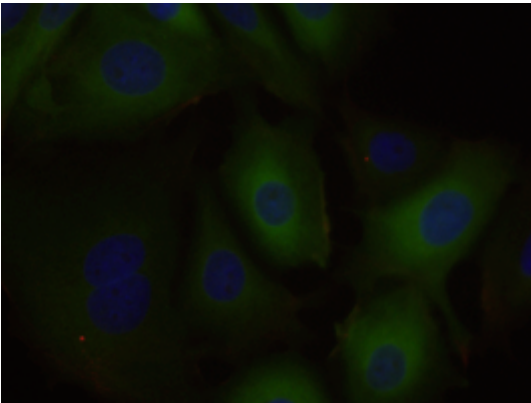

LTLT-Ca

Blue = DNA  
Green = Fascin
